# Supplementary material for: CD36 defines primitive chronic myeloid leukemia cells less responsive to imatinib but vulnerable to antibody-based therapeutic targeting
Source: PubMed Central journal article supplement — Haematologica. 2017 Dec 28;103(3):447–55. doi: 10.3324/haematol.2017.169946 (PMC5830390; doi:10.3324/haematol.2017.169946), 2018-03

## CD36 defines primitive chronic myeloid leukemia cells less responsive to imatinib but vulnerable to antibody-based therapeutic targeting

Niklas Landberg,<sup>1</sup> Sofia von Palffy,<sup>1</sup> Maria Askmyr,<sup>1</sup> Henrik Lilljebjörn,<sup>1</sup> Carl Sandén,<sup>1</sup> Marianne Rissler,<sup>1</sup> Satu Mustjoki,<sup>2</sup> Henrik Hjorth-Hansen,<sup>3</sup> Johan Richter,<sup>4</sup> Helena Ågerstam,<sup>1</sup> Marcus Järås<sup>4</sup> and Thoas Fioretos<sup>1</sup>

<sup>1</sup>Division of Clinical Genetics, Department of Laboratory Medicine, Lund University, Sweden; <sup>2</sup>Hematology Research Unit Helsinki, Department of Clinical Chemistry and Hematology, University of Helsinki, and Helsinki University Hospital Comprehensive Cancer Center, Finland; <sup>3</sup>Department of Hematology, St Olavs Hospital, Trondheim, Norway and <sup>4</sup>Department of Hematology, Oncology and Radiation Physics, Skåne University Hospital, Lund, Sweden

©2018 Ferrata Storti Foundation. This is an open-access paper. doi:10.3324/haematol.2017.169946

Received: April 10, 2017.

Accepted: December 18, 2017.

Pre-published: December 28, 2017.

Correspondence: niklas.landberg@med.lu.se or

thoas.fioretos@med.lu.se

---

## **SUPPLEMENTARY INFORMATION TO**

### **CD36 defines primitive chronic myeloid leukemia cells less responsive to imatinib but vulnerable to antibody based therapeutic targeting**

Niklas Landberg<sup>1</sup>, Sofia von Palffy<sup>1</sup>, Maria Askmyr<sup>1</sup>, Henrik Lilljebjörn<sup>1</sup>, Carl Sandén<sup>1</sup>, Marianne Rissler<sup>1</sup>, Satu Mustjoki<sup>2</sup>, Henrik Hjorth-Hansen<sup>3</sup>, Johan Richter<sup>4</sup>, Helena Ågerstam<sup>1</sup>, Marcus Järås<sup>1</sup>, and Thoas Fioretos<sup>1</sup>

<sup>1</sup>Division of Clinical Genetics, Department of Laboratory Medicine, Lund University, Lund, Sweden

<sup>2</sup>Hematology Research Unit Helsinki, Department of Clinical Chemistry and Hematology, University of Helsinki, and Helsinki University Hospital Comprehensive Cancer Center, Helsinki, Finland

<sup>3</sup>Department of Hematology, St Olavs Hospital, Trondheim, Norway

<sup>4</sup>Department of Hematology, Oncology and Radiation Physics, Skåne University Hospital, Lund, Sweden

## **Supplementary Material and Methods**

### *Cell growth and colony forming capacity upon leptin stimulation*

The t(9;22)-positive cell lines KU812, BV173, LAMA84 and K562 (DSMZ, Germany) were cultured in RPMI medium supplemented with fetal bovine serum (Gibco, USA) at concentrations according to manufacturers instructions, or StemSpan (Stemcell Technologies, Canada) in 48-well or 96-well plates. For leptin stimulation assays, cultures were supplemented with 100ng/ml or 200ng/ml leptin (Peprotech, USA). Cell growth was evaluated with CountBright Absolute Counting Beads (Thermo Fisher Inc) and DAPI (4',6-Diamidine-2'-phenylindole dihydrochloride; Sigma-Aldrich, USA) as a marker for viability. Analyses were performed on a LSR Fortessa (BD Bioscience, USA). To investigate colony forming capacity, cells were seeded at 1000 CD34<sup>+</sup> cells per 1.1 ml of semisolid MethoCult H4434 medium (Stemcell Technologies) and replated after 2 and 4 weeks. Colonies were scored after 2, 4 and 6 weeks.

### *Fluorescent in situ hybridization (FISH) on primary CML cells sorted by FACS*

Primary CML samples were sorted directly onto FISH slides, as previously described.<sup>1</sup> *BCR/ABL1* was detected using dual color, dual fusion *BCR/ABL1* probes (Abbott Molecular Inc, USA). All available cells were scored as *BCR/ABL1* positive, negative or inconclusive, the inconclusive group representing <1% of all cells scored. A mean of 280 cells per patient were scored.

## **REFERENCES**

1. Jaras M, Johnels P, Hansen N, et al. Isolation and killing of candidate chronic myeloid leukemia stem cells by antibody targeting of IL-1 receptor accessory protein. Proc Natl Acad Sci U S A. 2010;107(37):16280–5.

**Supplementary Table 1. CML patient characteristics**

| Patient # | Diagnosed | Gender | Age | Country | PB/BM | Treatment | Sokal | Hb (g/l) | Leu (10 <sup>9</sup> /l) | Trc (10 <sup>9</sup> /l) | BCR/ABL1 IS % |        |        | CD34+CD38low |          |            |
|-----------|-----------|--------|-----|---------|-------|-----------|-------|----------|--------------------------|--------------------------|---------------|--------|--------|--------------|----------|------------|
|           |           |        |     |         |       |           |       |          |                          |                          | dg            | 3mo    | 12mo   | IL1RAP (%)   | CD36 (%) | LEPR (MFI) |
| 1         | 2014      | F      | 46  | SE      | PB    | Bosutinib | 1,03  | N/A      | 47,6                     | 535                      | 107,847       | 3,136  | 0,029  | 93           | 84       | 386        |
| 2         | 2014      | F      | 32  | SE      | PB    | Bosutinib | 1,68  | N/A      | 69                       | 1286                     | 16,920        | 0,009  | N/A    | 60           | 72       |            |
| 3         | 2015      | F      | 65  | FI      | BM    | Imatinib  | 1,01  | N/A      | 117                      | 526                      | N/A           | N/A    | N/A    | 88           | 60       | 218        |
| 4         | 2015      | F      | 58  | NO      | PB    | Imatinib  | 2     | N/A      | 263,4                    | 386                      | 93,287        | N/A    | N/A    | 91           | 71       | 263        |
| 5         | 2015      | M      | 54  | NO      | BM    | Bosutinib | 0,86  | N/A      | 57,1                     | 700                      | 93,880        | 0,265  | 0,009  | 67           | 46       | 136        |
| 6         | 2015      | F      | 55  | NO      | BM    | Imatinib  | 0,78  | N/A      | 71,3                     | 298                      | 92,555        | 23,141 | 0,363  | 97           | 59       | 180        |
| 7         | 2015      | F      | 55  | SE      | BM/PB | Imatinib  | 1,09  | N/A      | 127,1                    | 762                      | 22,803        | 3,663  | N/A    | 90           | 76       | 299        |
| 8         | 2015      | M      | 71  | FI      | PB    | Imatinib  | 0,85  | N/A      | 83,6                     | 245                      | 63,690        | 41,432 | 0,009  | 4            | 6        |            |
| 9         | 2015      | N/A    | N/A | DK      | BM    | Imatinib  | N/A   | N/A      | N/A                      | N/A                      | N/A           | N/A    | N/A    | 73           | 46       |            |
| 10        | 2015      | F      | 51  | FI      | BM    | Imatinib  | 0,66  | N/A      | 23,3                     | 345                      | 85,243        | 8,478  | 0,075  | 34           | 15       |            |
| 11        | 2015      | M      | 73  | SE      | BM    | Imatinib  | 1,66  | N/A      | 10,9                     | 963                      | 12,614        | 1,974  | 0,133  | 53           | 82       | 155        |
| 12        | 2015      | M      | 52  | NL      | BM    | Imatinib  | 0,65  | N/A      | 143                      | 274                      | 104,142       | 28,653 | 32,845 | 3            | 2        |            |
| 13        | 2015      | M      | 53  | NL      | BM    | Bosutinib | 0,87  | N/A      | 55,6                     | 670                      | 76,735        | 1,221  | 0,049  | 25           | 20       |            |
| 14        | 2015      | F      | 62  | DK      | BM    | Bosutinib | 0,78  | N/A      | 55,3                     | 474                      | 78,990        | N/A    | N/A    | 30           |          |            |
| 15        | 2015      | F      | 77  | FI      | BM    | Bosutinib | 0,94  | N/A      | 30,8                     | 517                      | 24,272        | N/A    | N/A    | 20           |          |            |
| 16        | 2014      | M      | 59  | DK      | BM    | Dasatanib | 2,78  | 97       | 306,9                    | 514                      | 49,720        | 3,571  | 0,010  | 97           |          |            |
| 17        | 2014      | M      | 69  | NO      | BM    | Dasatanib | 1,59  | 102      | 40,2                     | 495                      | 15,944        | 0,010  | 0,000  | 97           |          | 122        |
| 18        | 2014      | M      | 45  | NO      | PB    | Dasatanib | 1,64  | 77       | 270                      | 472                      | 52,266        | 10,949 | 0,031  | 96           |          | 374        |
| 19        | 2014      | M      | 19  | NO      | PB    | Dasatanib | 0,82  | 88       | 347,1                    | 148                      | 44,510        | 4,001  | 0,029  | 97           |          |            |
| 20        | 2013      | M      | 49  | SE      | BM    | Dasatanib | 0,69  | 156      | 76,6                     | 269                      | 23,195        | 2,592  | 0,007  | 57           | 20       |            |
| 21        | 2009      | F      | 51  | SE      | BM    | Dasatanib | 0,82  | 118      | 40                       | 847                      | N/A           | 0,781  | 0,000  | 87           |          |            |
| 22        | 2009      | F      | 40  | SE      | BM    | Dasatanib | 0,67  | 137      | 11,4                     | 706                      | N/A           | 0,008  | 0,000  | 82           |          |            |
| 23        | 2010      | M      | 71  | SE      | BM    | Imatinib  | 0,93  | 123      | 37                       | 275                      | N/A           | 4,375  | 0,279  | 89           |          |            |
| 24        | 2010      | M      | 55  | SE      | BM    | Imatinib  | 0,75  | 141      | 65,1                     | 462                      | N/A           | 1,366  | 11,239 | 92           |          |            |
| 25        | 2010      | F      | 59  | SE      | BM    | Imatinib  | 0,8   | 111      | 97                       | 401                      | N/A           | 89,587 | 22,889 | 88           |          |            |
| 26        | 2011      | F      | 87  | SE      | BM    | N/A       | N/A   | N/A      | N/A                      | N/A                      | N/A           | N/A    | N/A    | 80           |          |            |
| 27        | 2012      | M      | 71  | SE      | BM    | N/A       | N/A   | N/A      | N/A                      | N/A                      | N/A           | N/A    | N/A    | 90           |          |            |
| 28        | 2013      | M      | 73  | SE      | BM    | N/A       | N/A   | N/A      | N/A                      | N/A                      | N/A           | N/A    | N/A    | 90           |          |            |
| 29        | 2013      | F      | 67  | SE      | BM    | N/A       | N/A   | N/A      | N/A                      | N/A                      | N/A           | N/A    | N/A    | 70           |          |            |
| 30        | 2013      | M      | 42  | SE      | BM    | N/A       | N/A   | N/A      | N/A                      | N/A                      | N/A           | N/A    | N/A    | 80           |          |            |
| 31        | 2016      | N/A    |     | SE      | PB    | N/A       | N/A   | N/A      | N/A                      | N/A                      | N/A           | N/A    | N/A    | 91           | 76       | 197        |
| 32        | 2004      | N/A    | 79  | SE      | BM    | N/A       | N/A   | N/A      | N/A                      | N/A                      | N/A           | N/A    | N/A    | 45           |          |            |
| 33        | 2003      | N/A    | 36  | SE      | BM    | N/A       | N/A   | N/A      | N/A                      | N/A                      | N/A           | N/A    | N/A    | 93           |          |            |
| 34        | 2003      | N/A    | N/A | SE      | BM    | N/A       | N/A   | N/A      | N/A                      | N/A                      | N/A           | N/A    | N/A    | 86           | 74       |            |

Abbreviations: N/A, not available; F, female; M, male; SE, Sweden; FI, Finland; NO, Norway; DK, Denmark; NL, Netherlands; Hb, hemoglobin; Leu, leukocytes; Trc, thrombocytes dg, diagnosis; 3mo, 3 months; 12mo, 12 months; RNA-Seq, RNA sequencing.

**Supplementary Table 2. Antibodies used in flow cytometry**

| <b>Target</b>       | <b>Fluorochrome</b> | <b>Company</b> | <b>Isotype</b>    |
|---------------------|---------------------|----------------|-------------------|
| CD34                | AF488               | BioLegend      | mouse IgG1        |
| CD38                | BV786               | BD             | mouse IgG1        |
| CD123               | AF488               | BioLegend      | mouse IgG1        |
| CD45RA              | PE-Cy7              | BD             | mouse IgG2b       |
| CD90                | PerCP-Cy5.5         | BD             | mouse IgG1        |
| * IL1RAP            | Biotin              | RnD Systems    | mouse IgG1        |
| CD25                | BV421               | BD             | mouse IgG1        |
| CD26                | FITC                | EBioScience    | mouse IgG1        |
| NCAM1               | PE                  | BD             | mouse IgG1        |
| CD36                | PE                  | BD             | mouse IgM         |
| CD36                | Biotin              | Innovagen      | polyclonal rabbit |
| CD36                | -                   | Innovagen      | polyclonal rabbit |
| LEPR                | AF647               | BD             | mouse IgG2b       |
| LEPR                | PE                  | RnD Systems    | mouse IgG2b       |
| LEPR                | Biotin              | Innovagen      | polyclonal rabbit |
| LEPR                | -                   | Innovagen      | polyclonal rabbit |
| CD93                | PE                  | BioLegend      | mouse IgG1        |
| ITGB3               | PE                  | BD             | mouse IgG1        |
| TFRC                | PE                  | BD             | mouse IgG2a       |
| IL12RB1             | PE                  | BD             | mouse IgG1        |
| TYRO3               | PE                  | RnD Systems    | mouse IgG1        |
| TNFRSF18            | PE                  | BioLegend      | mouse IgG1        |
| CD7                 | PE                  | BD             | mouse IgG1        |
| GP6                 | PE                  | BD             | mouse IgG1        |
| CD32                | PE                  | RnD Systems    | mouse IgG2a       |
| HMM                 | -                   | Abcam          | polyclonal rabbit |
| ECE1                | -                   | RnD Systems    | rat IgG1          |
| Isotype             | PE                  | BioLegend      | mouse IgG1        |
| Isotype             | PE                  | BD             | mouse IgM         |
| Isotype             | PE                  | BioLegend      | mouse IgG2a       |
| Isotype             | PE                  | RnD            | mouse IgG2b       |
| Isotype             | PE                  | Abcam          | polyclonal rabbit |
| Isotype             | BV786               | BD             | mouse IgG1        |
| Isotype             | AF647               | BioLegend      | mouse IgG2b       |
| Isotype             | Biotin              | LSBio          | polyklonal rabbit |
| Isotype             | Biotin              | BioLegend      | mouse IgG2a       |
| Isotype             | -                   | Abcam          | polyclonal rabbit |
| Isotype             | -                   | Abcam          | polyclonal rabbit |
| Isotype             | -                   | RnD Systems    | rat IgG1          |
| ** Lineage-cocktail | Pacific Blue        | BioLegend      | -                 |
| Anti-rabbit         | BV421               | BD             | polyclonal goat   |
| Anti-rat            | APC                 | RnD Systems    | polyclonal goat   |
| Anti-rabbit         | PE                  | RnD Systems    | polyclonal goat   |
| Streptavidin        | BV421               | BD             | -                 |
| Viability Dye       | 7AAD                | BD             | -                 |
| Viability Dye       | DAPI                | BioLegend      | -                 |
| Viability Dye       | Draq7               | Biostatus      | -                 |

\*, antibody conjugated to biotin by Innovagen; \*\*, CD3, CD14, CD16, CD19, CD20, CD56

## Supplementary Figure Legends

### Supplementary Figure S1

FACS gates used for sorting primary CML cells for *in vitro* cultures. The CD34<sup>+</sup>CD38<sup>low</sup> gate was set to include 5% of CD34<sup>+</sup> cells. The IL1RAP gates were based on previously determined IL1RAP expression and set with approximately 10% margin. The CD36 positive and CD36 negative gates were based on previously determined CD36 expression for the particular CML sample leaving 20% of cells as CD36<sup>intermediate</sup> in order to obtain more pure cell populations. The figure shows CML #7 as a representative example. For CML #4 no IL1RAP-targeting antibody was used, instead CD36 gates were directly added to the CD34<sup>+</sup>CD38<sup>low</sup> cell fraction, the CD34<sup>+</sup>CD38<sup>low</sup> compartment of CML #4 were separately shown to be >90% IL1RAP<sup>+</sup>.

### Supplementary Figure S2

RNA-sequencing of sorted primary CML CD34<sup>+</sup>CD38<sup>low</sup> cells from 10 newly diagnosed chronic phase CML patients and corresponding healthy controls (n=4). The heat map shows down regulated cell surface associated genes in primitive CML samples compared to healthy hematopoietic stem cell-enriched cells (up regulated genes are shown in Figure 1C)

### Supplementary Figure S3

Low or absent expression of CD36 and LEPR in progenitor cells of healthy bone marrow. (A) Histograms showing CD36 and LEPR expression in CD34<sup>+</sup>CD38<sup>+</sup> cells from five and four normal bone marrow (NBM) donors, respectively. (B). Detailed analysis of CD36 and LEPR expression in stem and progenitor populations from two normal bone marrow donors. Isotype based on all CD34 expressing cells. LMPP, lymphoid-primed

multipotent progenitors (Lin<sup>-</sup>CD34<sup>+</sup>CD38<sup>-</sup>CD45RA<sup>+</sup>); HSC, hematopoietic stem cells (Lin<sup>-</sup>CD34<sup>+</sup>CD38<sup>-</sup>CD90<sup>+</sup>CD45RA<sup>-</sup>); MPP, multipotent progenitors (Lin<sup>-</sup>CD34<sup>+</sup>CD38<sup>-</sup>CD90<sup>-</sup>CD45RA<sup>-</sup>); MEP, megakaryocyte-erythroid progenitors (Lin<sup>-</sup>CD34<sup>+</sup>CD38<sup>+</sup>CD123<sup>-</sup>CD45RA<sup>-</sup>); GMP, granulocyte-macrophage progenitors (Lin<sup>-</sup>CD34<sup>+</sup>CD38<sup>+</sup>CD123<sup>+</sup>CD45RA<sup>+</sup>); CMP, common myeloid progenitors (Lin<sup>-</sup>CD34<sup>+</sup>CD38<sup>+</sup>CD123<sup>+</sup>CD45RA<sup>-</sup>).

#### **Supplementary Figure S4**

The individual LEPR flow cytometry datapoints and their corresponding isotype control plotted in pairs show LEPR overexpression in CML samples (n=10) but not NBM (n=4). Two asterisks (\*\*) indicates p<0.01, ns; not significant.

#### **Supplementary Figure S5**

Leptin does not confer a growth advantage to CML cells. **(A)** The cell growth of KU812 and K562 cells is not affected by the addition of 100ng/ml leptin to in vitro cultures in RPMI or StemSpan media. **(B)** Cell growth of primary CD34<sup>+</sup> CML cells is not affected by the addition of 100ng/ml leptin to the cell cultures, evaluated in three different CML patient samples. **(C)** No proliferative advantage is seen on FACS sorted primitive (CD34<sup>+</sup>CD38<sup>low</sup>) CML patient cells when cultured with and without the addition of leptin (100 ng/ml or 200 ng/ml) for 7 days. **(D)** The colony forming capacity of primary CD34<sup>+</sup> CML is not altered by the presence of 100ng/ml leptin in the semisolid cultures. CFU-GEMM, colony forming unit - granulocyte, erythrocyte, monocyte, megakaryocyte; BFU-E, burst forming unit - erythroid; CFU-M, colony forming unit - macrophage; CFU-G, colony forming unit - granulocyte.

### **Supplementary Figure S6**

Co-expression analysis of IL1RAP and CD36 in CD34<sup>+</sup>CD38<sup>low</sup> cells of CML patients. **(A)** Example of co-expression profiles of CD36 and IL1RAP. **(B)** Summary of IL1RAP and CD36 co-expression data in CD34<sup>+</sup>CD38<sup>low</sup> cells from 14 CML patients show a majority of cells with an IL1RAP<sup>+</sup>CD36<sup>+</sup> phenotype (median 43%), similar amounts of IL1RAP<sup>+</sup>CD36<sup>-</sup> cells (median 17%) and IL1RAP<sup>-</sup>CD36<sup>-</sup> (median 15%), and very few IL1RAP<sup>-</sup>CD36<sup>+</sup> cells (median 5%). Bar plot showing median values and interquartile range.

### **Supplementary Figure S7**

Sensitivity of primitive CML cells to nilotinib. **(A)** CD34<sup>+</sup>CD38<sup>low</sup>IL1RAP<sup>+</sup> CML cells sorted based on CD36 expression do not differ in cell growth and survival following in vitro culture for 72 hours. Mean of three (CD36<sup>+</sup>) or two (CD36<sup>-</sup>) CML samples is shown and error bars depict standard deviation. **(B)** CD34<sup>+</sup>CD38<sup>low</sup>IL1RAP<sup>+</sup> CML cells FACS sorted according to CD36 expression and treated with nilotinib at a concentration of 5 $\mu$ M for 72 hours show no differences in cell survival. Mean of three CML samples is shown and error bars depict standard deviation.

### **Supplementary Figure S8**

Cell cycle analysis of progenitor (CD34<sup>+</sup>CD38<sup>+</sup>) CML patient cells. The histogram to the left shows the cell cycle status of a representative CML sample with 67% of the cells in the G0/G1-phase and 33% in the S/G2/M-phase. The bar-plot to the right shows the cell cycle distribution (mean of three CML samples) with error bars depicting standard deviation.



### **Supplementary Figure S9**

CD36<sup>+</sup> and CD36<sup>-</sup> cells within the CD34<sup>+</sup>CD38<sup>low</sup>IL1RAP<sup>+</sup> population do not differ in expression of cell surface markers CD25 and CD26. (A) Gates used to define CD38<sup>low</sup>IL1RAP<sup>+</sup>CD36<sup>+</sup> and CD38<sup>low</sup>IL1RAP<sup>+</sup>CD36<sup>-</sup> cells. (B) Histograms from a representative CML patient show similar expression patterns of CD25 and CD26 in the CD36<sup>+</sup> and CD36<sup>-</sup> cells, respectively (C) Summary of protein expression from three CML patients show no difference in mean expression of CD25 (p=0.761) or CD26 (p=0.860), respectively.

### **Supplementary Figure S10**

CD36 expression on CML cells decrease following *in vitro* culture. (A) Ten thousand CD34<sup>+</sup> cells were sorted from two CML patients and kept in StemSpan medium for up to eight days. A reduction in CD36 expression was observed already after one day and further reduced during one week of culture. One representative CML patient sample is shown. (B) Two thousand five hundred CD34<sup>+</sup>CD38<sup>low</sup> cells were sorted into StemSpan medium and cultured for 7 days. CD36 expression decreased spontaneously from 83% to 11% during the culture period. (C) Two thousand CD34<sup>+</sup>CD38<sup>low</sup>CD36<sup>+</sup> cells from one representative CML patient were sorted into StemSpan medium and cultured for three days. Prior to sorting 75% of viable CD34<sup>+</sup>CD38<sup>low</sup> cells expressed CD36; the 60% with the highest expression were sorted to achieve 100% CD36 expressing cells at day 0 of the culturing period. After three days, 29% of viable cells still had detectable CD36 expression.

### **Supplementary Figure S11**

Increasing antibody concentrations do not induce direct cell killing of KU812 cells in the absence of NK-cells when kept in culture with polyclonal rabbit anti-CD36 antibodies or corresponding isotype control antibodies

# Supplementary Figure S1

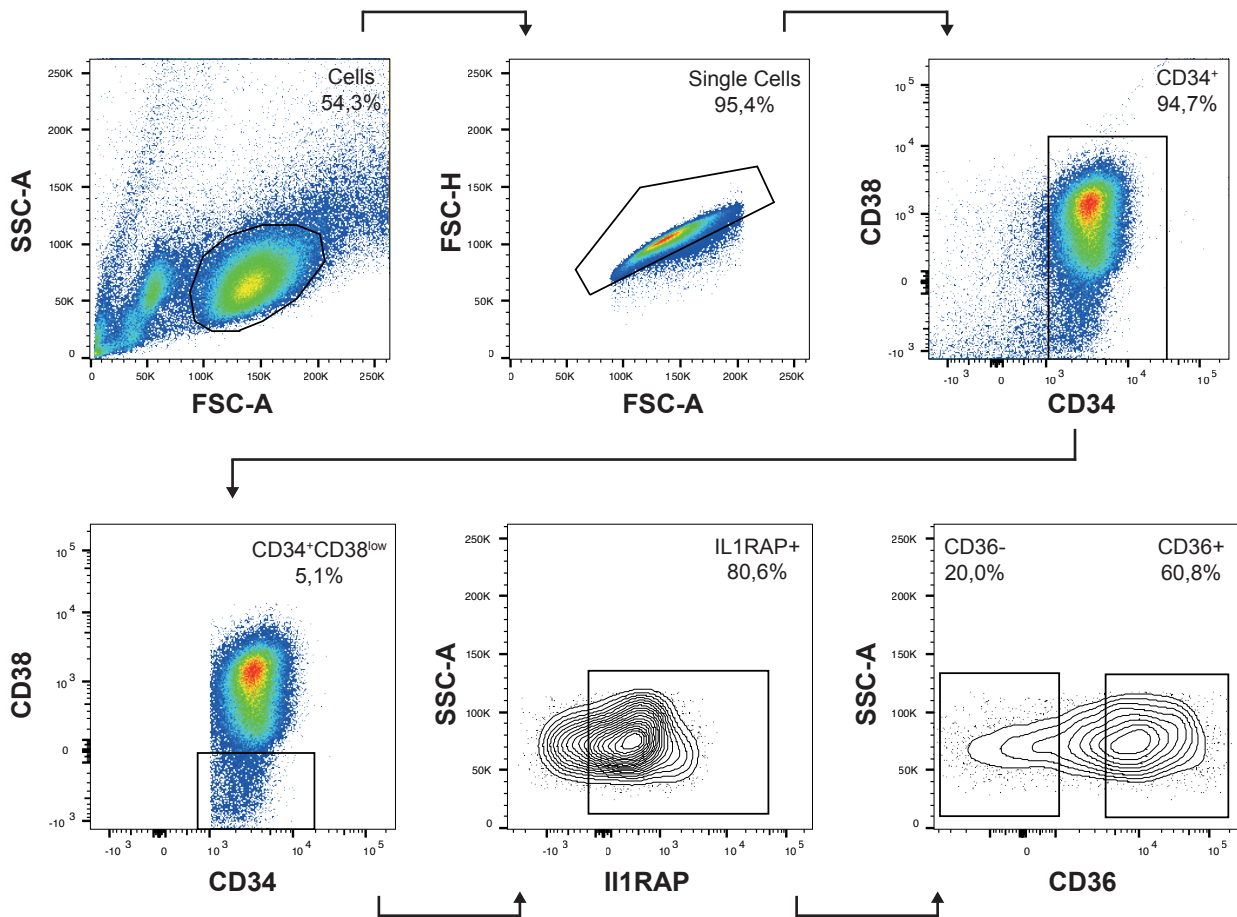

Supplementary Figure S2

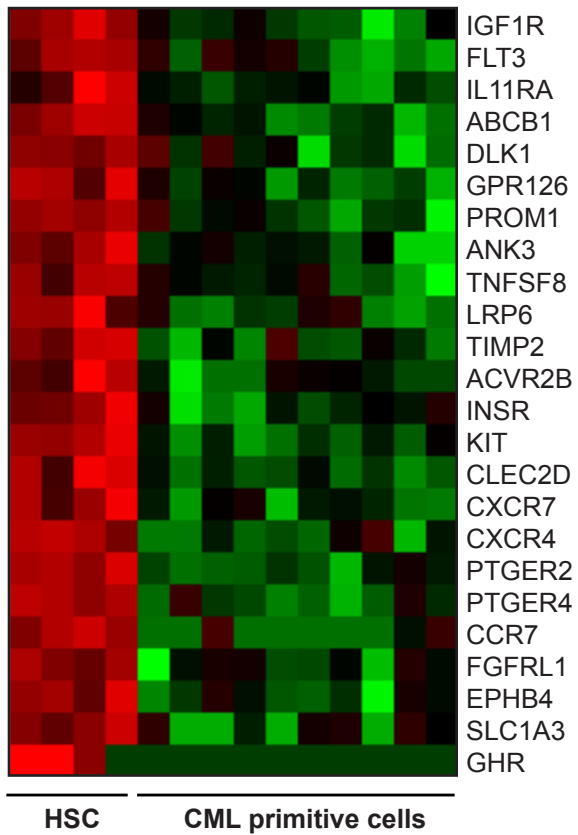

A

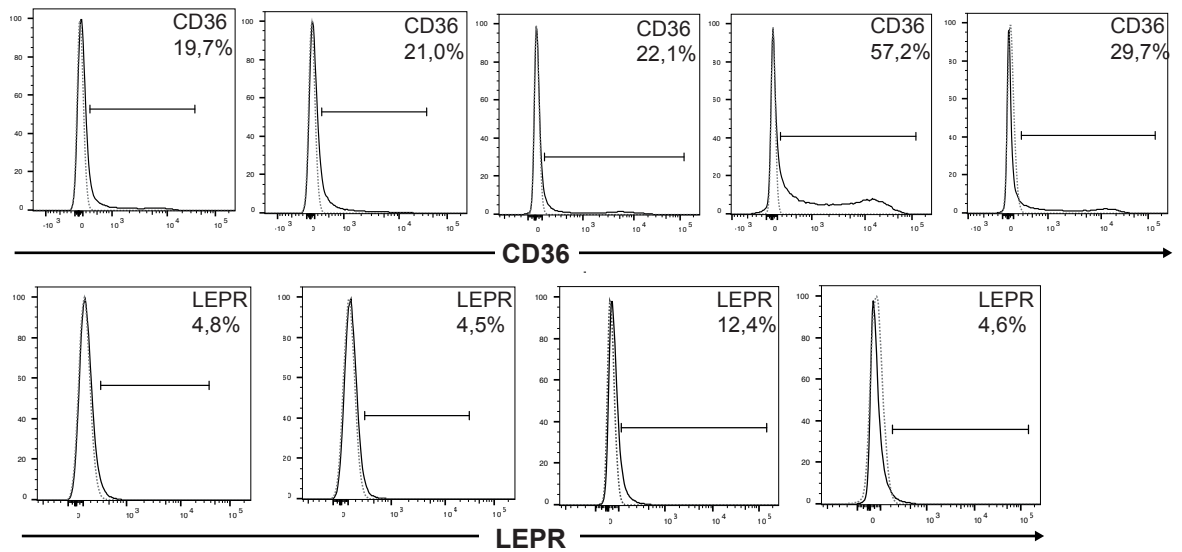

B

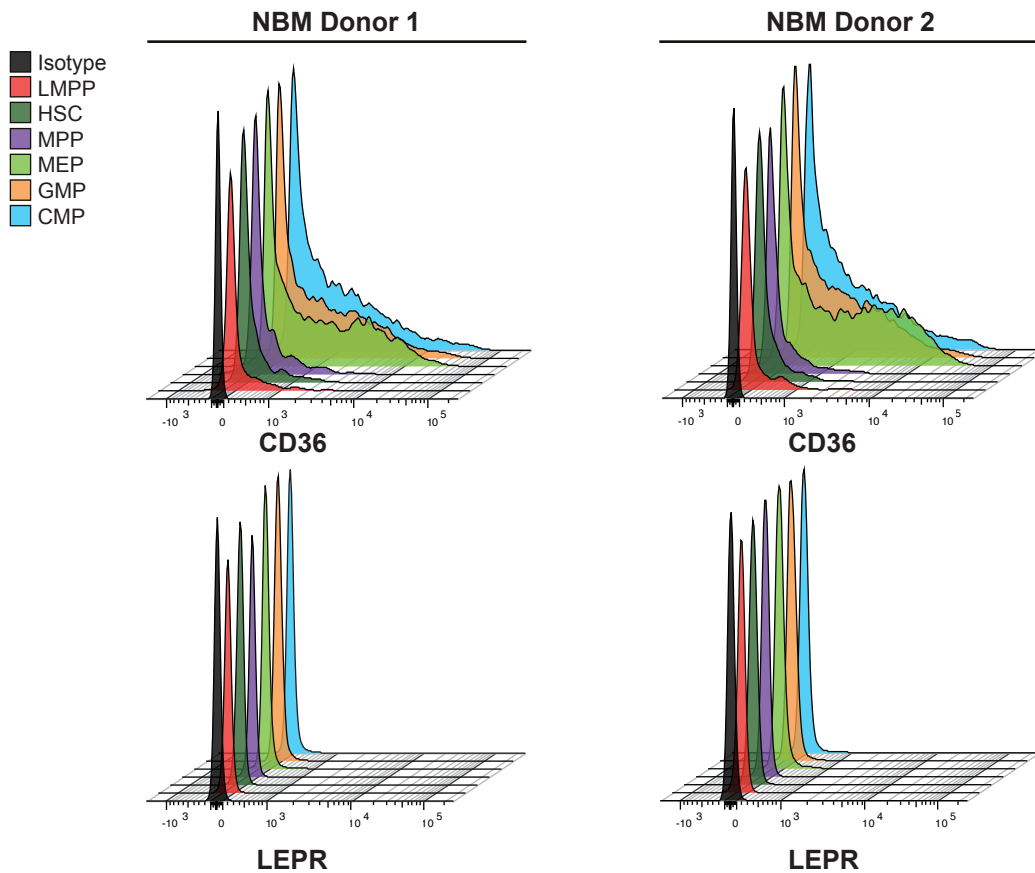

# Supplementary Figure S4

## CD34<sup>+</sup>CD38<sup>low</sup> cells

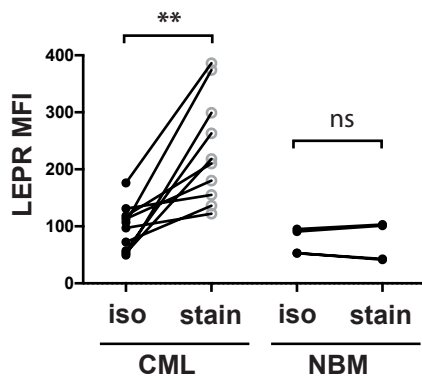

# Supplementary Figure S5

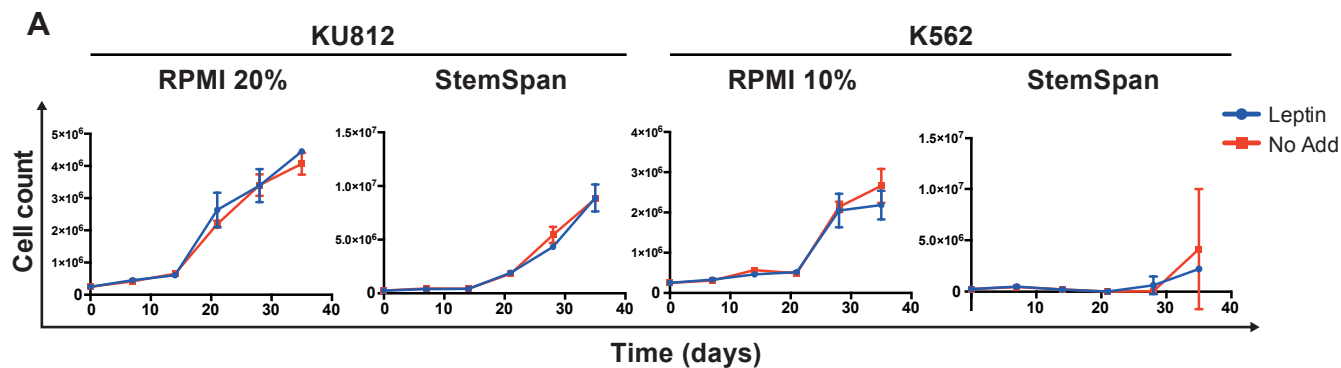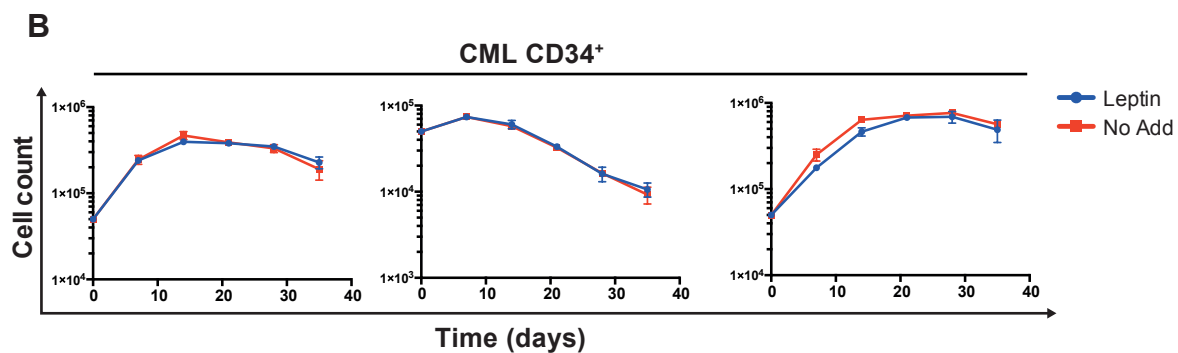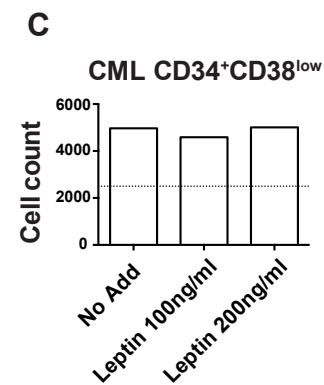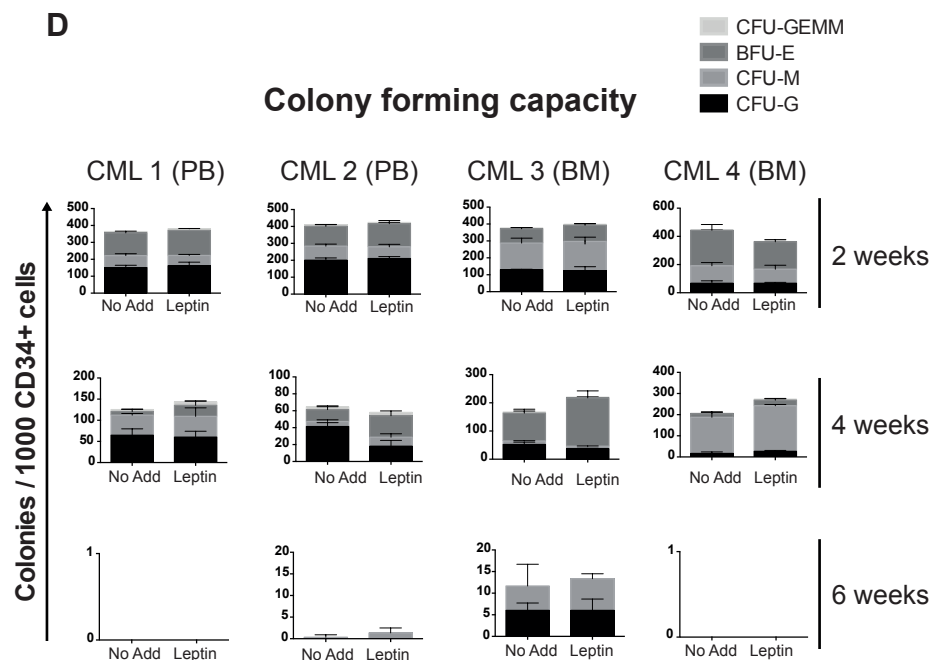

A

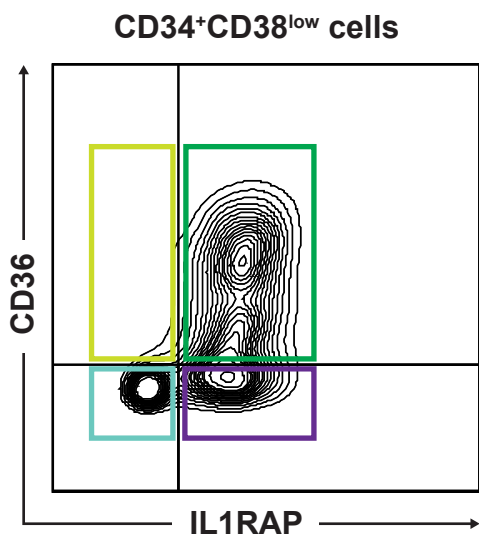

B

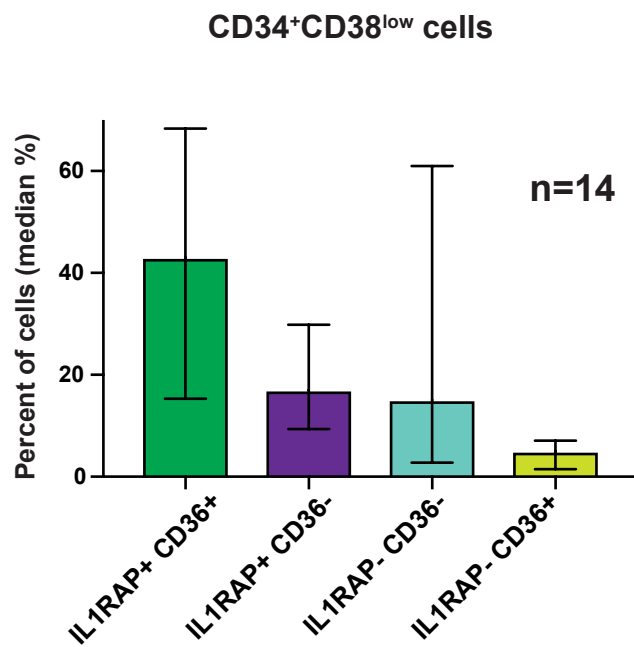



# Supplementary Figure S7

**A**

Untreated

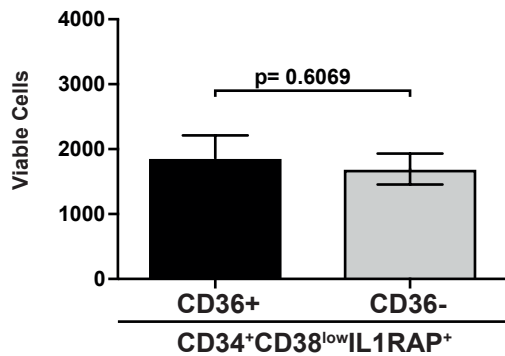

**B**

Nilotinib 5uM

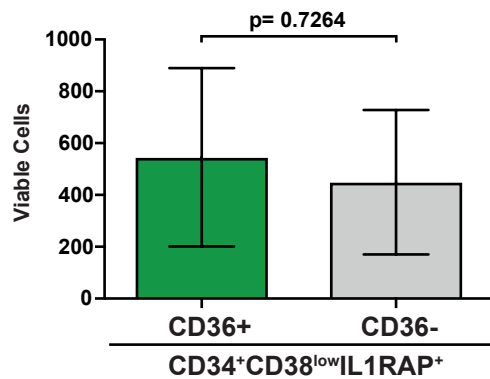

**CD34<sup>+</sup>CD38<sup>+</sup>**

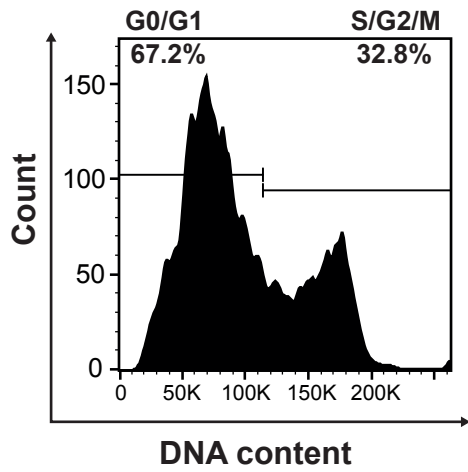

**CD34<sup>+</sup>CD38<sup>+</sup>**

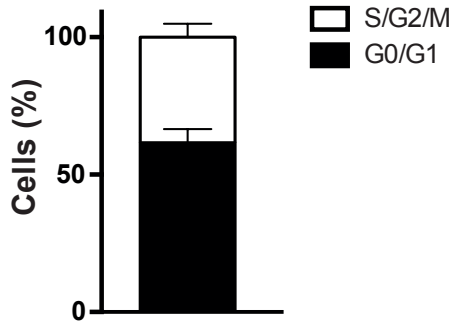

A

Viable, Single Cell, CD34<sup>+</sup> cells

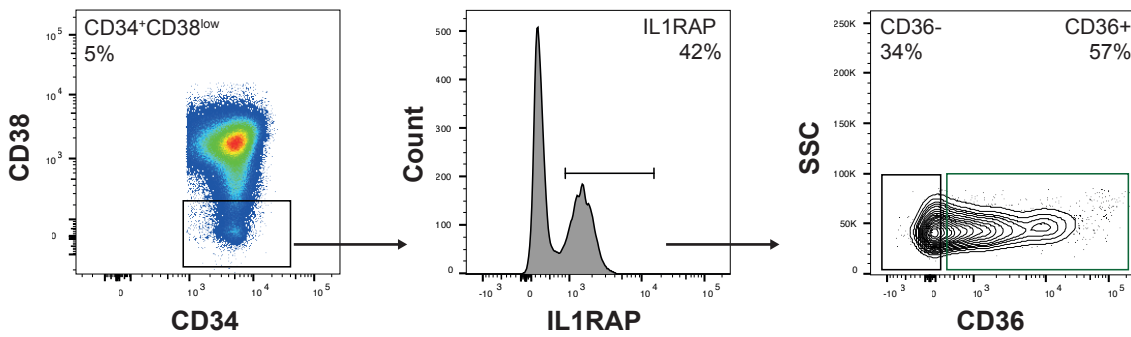

B

CD34<sup>+</sup>CD38<sup>low</sup>IL1RAP<sup>+</sup> cells

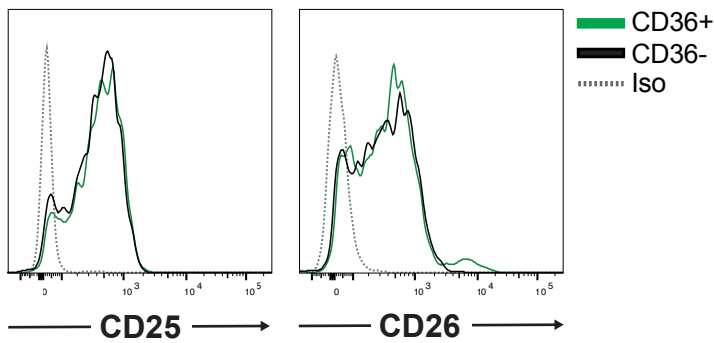

C

CD34<sup>+</sup>CD38<sup>low</sup>IL1RAP<sup>+</sup> cells

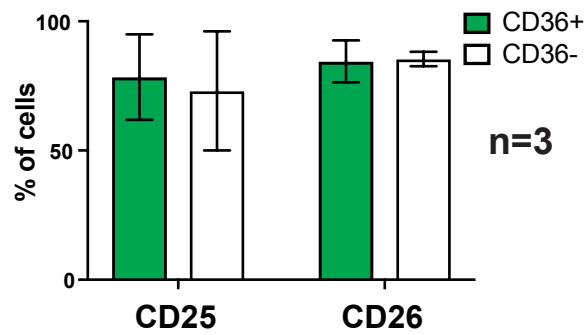

# Supplementary Figure S10

**A**

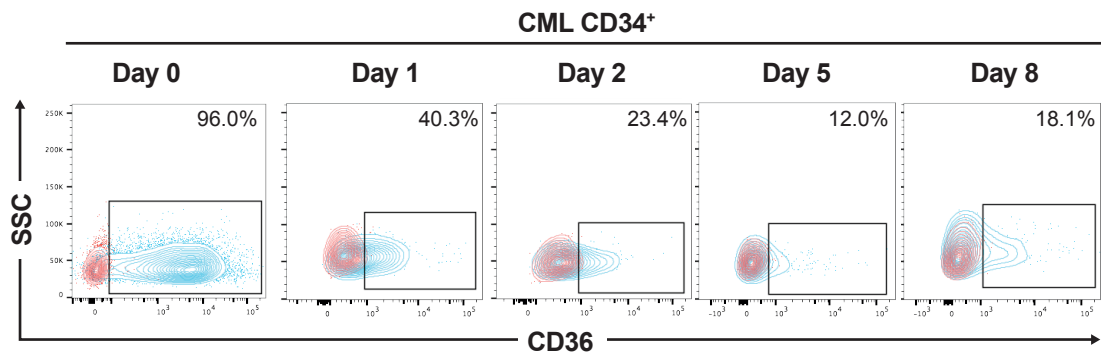

**B**

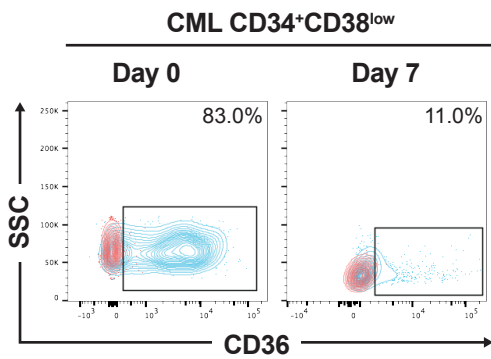

**C**

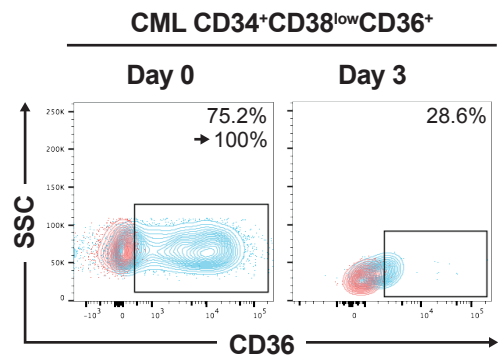

### KU812, no NK cells

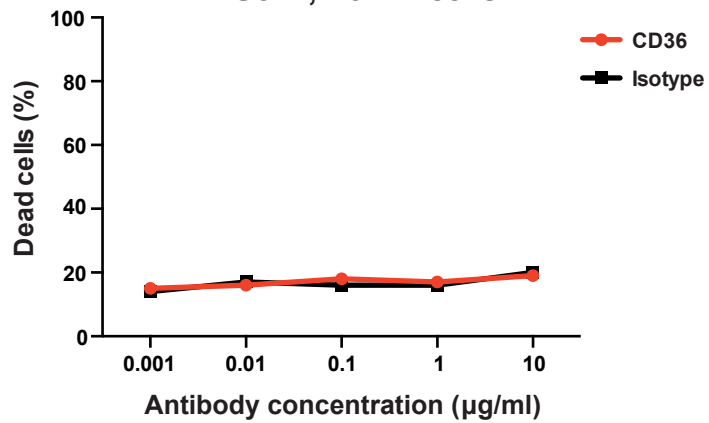

Supplement: 2017.169946.LANDBERG_SUPPL.pdf [file 2017.169946.LANDBERG_SUPPL.pdf]
